# Supplementary material for: The interaction of SAMM50-rs738491, PARVB-rs5764455 and PNPLA3-rs738409 increases the susceptibility to nonalcoholic steatohepatitis
Source: Research Square preprint supplement (doi:10.21203/rs.3.rs-108430/v1), 2020-11-17
Supplement: Supplementary file 1 [file 837f622048fa1ef1356f1ef8.docx]

**Table S1. Distribution of genotypes of genetic variants in *SAMM50-rs738491, PARVB-rs5764455* and *PNPLA3-rs738409* stratified by BMI in NASH patients.**

| **Genotypes and Alleles** | **BMI<25 kg/m2** | **BMI≥25 kg/m2** | ***χ2*** | ***P-value*** |
| --- | --- | --- | --- | --- |
| ***SAMM50-rs738491*** | |  |  |  |
| **Genotypes** |  |  | 1.071 | 0.585 |
| CC | 13 (21.7) | 30 (16.1) |  |  |
| CT | 26 (43.3) | 82 (44.1) |  |  |
| TT | 21 (35.0) | 74 (39.8) |  |  |
| ***PARVB-rs5764455*** | |  |  |  |
| **Genotypes** |  |  | 3.676 | 0.159 |
| GG | 19 (31.7) | 38 (20.4) |  |  |
| GA | 25 (41.7) | 99 (53.2) |  |  |
| AA | 16 (26.7) | 49 (26.3) |  |  |
| ***PNPLA3-rs738409*** | |  |  |  |
| **Genotypes** |  |  | 0.072 | 0.965 |
| CC | 15 (25.0) | 46 (24.7) |  |  |
| CG | 28 (46.7) | 84 (45.2) |  |  |
| GG | 17 (28.3) | 56 (30.1) |  |  |

Data are expressed as No. (%) and tested by Pearson χ2 test and Fisher’s exact test.
